1 **Direct and correlated responses to laboratory selection for body melanisation in *D.***  
2 ***melanogaster*: support for melanism- desiccation resistance hypothesis.**

3

4 **Seema Ramniwas\*, Babita Kajla, Kapil Dev and Ravi Parkash**

5

6 *Department of Genetics, Lab No. 13, Maharshi Dayanand University, Rohtak-124001, India.*

7 *Tel. no. +91- 8930787521*

8

9 *\*Author for correspondence (seema.ramniwas@gmail.com)*

10

11 **Running title:** Melanism- Desiccation hypothesis revisited

12

13

14

15

16

17

18

19

20

21

22

23

## SUMMARY

24  
25  
26  
27  
28  
29  
30  
31  
32  
33  
34  
35  
36  
37  
38  
39  
40  
41  
42  
43  
44  
45

For *Drosophila melanogaster*, cuticular melanisation is a quantitative trait, varying from no melanin to complete dark. Variation in melanisation has been linked with stress resistance, especially desiccation, in *D. melanogaster* and other species. As melanism has a genetic component, we selected melanic and non-melanic phenotypes of *D. melanogaster*, in order to confirm the association of desiccation resistance and rate of water loss with cuticular melanisation previously reported for this species. A bidirectional selection experiment for dark (D1- D4) and light (L1- L4) body color in *D. melanogaster* was conducted for 60 generations. In 60 generations of selection for pigmentation, an increase of 1.6 fold in selected dark strain and decrease of 14 folds in selected light strain was observed as compared to control populations. Desiccation resistance increased significantly in the dark selected morphs as compared with control. The observed increase in desiccation resistance appeared as a consequence of decrease in cuticular permeability. Our results show that water balance related traits were significantly correlated with abdominal melanisation and were simultaneously selected bidirectionally along with melanisation.

Keywords: Artificial selection experiment, abdominal melanisation, correlated responses, desiccation resistance, *Drosophila melanogaster*

## INTRODUCTION

46  
47  
48  
49  
50  
51  
52  
53  
54  
55  
56  
57  
58  
59  
60  
61  
62  
63  
64  
65  
66  
67

Several studies have shown evidences for the role of natural selection in maintaining phenotypic variation in body melanisation of diverse insect taxa (Majerus, 1998; True, 2003). In *D. melanogaster*, body melanisation is a quantitative trait and shows significant levels of both within and between population variations (Parkash et al., 2008). Geographical populations of *D. melanogaster* from Africa (Pool and Aquadro, 2007), India (Parkash et al., 2008) and Australia (Telonis- Scott et al., 2011) have shown clinal variation in abdominal or thoracic melanisation which suggest adaptations to local climatic conditions. In several other studies, clinal variation is evident for many stress related traits which covary strongly with latitude or altitude (Parkash et al., 2008). However, it is not clear whether various ecologically relevant quantitative traits show independent or correlated selection responses. For example, associations between body melanisation and desiccation related traits have been observed in latitudinal as well as altitudinal populations of *D. melanogaster* from India but these studies provide indirect evidence (Parkash et al., 2008a). If desiccation resistance evolves through changes in cuticular permeability in *D. melanogaster*, the target of selection might be cuticular components (cuticular melanisation and/or cuticular lipids). A possible link between body melanisation and desiccation resistance can be shown if laboratory selected strains for higher melanisation evidence increased desiccation but this hypothesis has not been tested so far in *D. melanogaster* as well as other *Drosophila* species.

For wild populations, ecophysiological and morphological traits might coevolve according to their combined influence on fitness (Angilletta, 2009). For example, tropical habitats on the Indian subcontinent select lighter body color phenotype as well as starvation

68 tolerance (Parkash and Munjal, 2000) but it is not clear whether these traits are under  
69 independent selection or coevolve. Further, there are evidences in favor of coadaptation hypothesis  
70 (Angilletta, 2009) e.g. behavioral thermoregulation and body coloration are coadapted traits in  
71 pygmy grasshopper (*Tetrix subulata*; Forsman, 2000). Coadapted traits are also represented by  
72 associations between body melanisation and desiccation related traits (Parkash et al., 2008a,  
73 2010a) and thermo-resistance traits in *D. melanogaster* (Parkash et al., 2010b). Cuticular  
74 hydrocarbons are also subject to natural selection, being important in providing desiccation  
75 resistance for many insect species (Gibbs & Rajpurohit, 2010). Several insect taxa have shown  
76 variable cuticular permeability due to changes in the composition or amount of cuticular lipids  
77 (Edney, 1977; Toolson, 1984; Hadley, 1994; Rourke, 2000). There are clines of water balance  
78 measures correlated with the amount of cuticular lipids (Rourke, 2000; Parkash et al., 2008a).  
79 Seasonal changes in the composition or amount of cuticular lipids also affect water loss in  
80 scorpions and tenebrionid beetles (Hadley, 1977; Toolson and Hadley, 1979; Hadley and  
81 Schultz, 1987). In contrast, analysis of water balance mechanisms in diverse *Drosophila* species  
82 have shown lack of changes in cuticular traits for reduced body water loss (Gibbs et al., 1998,  
83 2003; Gibbs and Matzkin, 2001; Parkash et al., 2008a) Further, there is lack of differences in  $T_m$   
84 (melting temperature), composition and/or amount of surface lipids in laboratory selected  
85 desiccation-resistant and sensitive strains of *D. melanogaster* (Gibbs et al., 1997). Within  
86 species, Indian populations of *D. immigrans* differ in water-loss rate, but not in surface lipid  
87 amounts (Parkash et al., 2008c). In a laboratory selection experiment, populations selected for  
88 desiccation resistance lost water ~50% less rapidly than unselected controls, but the two groups  
89 exhibited minor differences in lipid composition and  $T_m$  (Gibbs et al., 1997). Thermal  
90 acclimation of the desert fly, *D. mojavensis*, results in substantial changes in HC composition,

91 but relatively little change in water-loss rates (Gibbs et al., 1998). It must be noted that not all  
92 studies result in negative findings (e.g. Toolson, 1982; Toolson and Kuper-Simbrón, 1989). If  
93 ecophysiological traits and cuticular traits (body melanisation and/ or cuticular lipids) coevolve,  
94 we may expect correlated responses between body color phenotypes and stress-related traits in  
95 *D. melanogaster* but such traits associations have not been analyzed so far.

96 Several studies have focused on laboratory selection of desiccation resistance (Hoffmann  
97 and Parson, 1989a, b; 1993; Gibbs et al., 1997; Chippindale et al., 1998; Djawdan et al., 1998;  
98 Telonis- Scott et al., 2006); thermal sensitivity (Huey et al., 1991; Gilchrist and Huey 1999;  
99 Anderson et al., 2005) and starvation resistance (Chippindale et al., 1996; Harshman et al., 1999;  
100 Bublly and Loeschke, 2005). In contrast, a single study on laboratory selection of abdominal  
101 spot number in *Drosophila falleni* has shown that selection exerted by nematode parasites may  
102 influence pigmentation patterns (Dombeck and Jaenike, 2004). In most of the laboratory  
103 selection studies, replicate lines at the end of selection protocol were investigated for changes in  
104 the trait of interest as well as correlated selection responses but time course of evolutionary  
105 response in the selected lines has not been investigated. A time course analysis is although time  
106 consuming but can be helpful in better understanding the selected as well as correlated traits.

107 Experiments of artificial selection in *Drosophila* have recently been used as an  
108 experimental evolutionary tool to identify the relevant traits that are most likely to be involved in  
109 adaptation to environmental temperature in ectotherms (Hoffmann et al., 2003; Bowler  
110 and Terblanche, 2008). One of the main advantages of artificial selection experiments is the  
111 possibility to evaluate not only direct, but also the correlated responses to selection (Harshman  
112 and Hoffmann, 2000). Artificial selection experiments have revealed moderate to relatively high  
113 levels of heritability for resistance to high-temperature stress in *D. melanogaster* (Hoffmann et

114 al., 2003; Reusch and Wood, 2007). Remarkably, most artificial selection programs were mainly  
115 performed in *D. melanogaster*, though recent studies have also addressed the question whether or  
116 not results in *D. melanogaster* are consistent across species (Hoffmann and Willi, 2008). Further,  
117 artificial selection on thermal-stress traits was generally performed in only a single direction  
118 (mainly, for increased resistance), but studies have shown that selection for decreased resistance  
119 to heat stress can also be informative as the selection response can often be asymmetrical for  
120 thermal-stress traits (Gilchrist and Huey, 1999; Folk et al., 2006; Norry et al., 2007; Mori and  
121 Kimura, 2008; Gomez et al., 2009; Bertoli et al., 2009).

122         Body melanisation is one of the most common types of phenotypic variations in insects  
123 (Majerus, 1998). Phenotypic variation of body melanisation in some lepidopterans and  
124 coelopterans are represented by discrete morphs (melanic and non-melanic) consistent with a  
125 major locus (da Cunha, 1949; Napp Martinez and Cordeiro, 1970). Several studies have shown  
126 changes in the frequencies of two or more allelic variants in response to temporally or spatially  
127 variable climatic conditions (Umina et al., 2005; Parkash et al., 2009; 2012). In contrast,  
128 variation in body melanisation in a *D. melanogaster* population follows a bell shaped curve and  
129 such a quantitative trait is expected to respond fast to laboratory as well as field selection. Such  
130 pigmentation differences are polygenic and interact with abiotic factors of the environment  
131 (Wittkopp et al., 2003). In *D. melanogaster*, melanisation varies continuously across  
132 geographical gradients on different continents and such clines linked with body melanisation  
133 reflect adaptations to local climatic conditions (David et al., 1985; Capy et al., 1988; Munjal et  
134 al., 1997; Pool and Aquadro, 2007, Clusella Trullas et al., 2007; Telonis-Scott et al., 2011).  
135 Several studies have considered plastic change in melanisation scores at different growth

136 temperatures in the laboratory populations of *D. melanogaster* (Das et al., 1994; Ottenheim et al.,  
137 1999; Gibert et al., 1996, 2000; DeWitt and Scheiner, 2004).

138 Melanin patterns are involved in diverse aspects of insect ecology (Majerus, 1998, True  
139 2003). For example, increased melanisation has been associated with higher fitness under  
140 thermal as well as aridity stresses in *D. melanogaster* i.e. a darker cuticle may improve  
141 thermoregulation as well as may reduce cuticular water loss (Parkash et al., 2008). Changes in  
142 body melanisation are associated with thermal and/ or water stress related traits but the target of  
143 selection is not clear. Laboratory selection of desiccation and starvation resistance show parallel  
144 responses in *D. melanogaster* while field population show opposite clines. Such a mismatch  
145 between field vs. laboratory selection may be due to selection acting on some other associated  
146 trait which may impact resistance to starvation and desiccation in different ways. There is ample  
147 empirical support for the thermal melanism hypothesis (Watt, 1969, David et al., 1985, 1990; de  
148 Jong et al., 1996, Majerus, 1998, Rajpurohit et al., 2008). Several studies have demonstrated a  
149 direct influence of melanization on body temperature, by increasing solar absorption under cool  
150 conditions (de Jong et al., 1996; Ottenheim *et al.*, 1999; Ellers and Boggs, 2004). Furthermore,  
151 the higher body temperature in more melanized females also increases egg maturation rate  
152 (Ellers and Boggs, 2004) and, in ladybird beetles, dark-coloured individuals benefit from  
153 increased mating success and earlier emergence in spring (Ellers & Boggs, 2004). In copper  
154 butterflies, pupal and wing melanization increased with increasing altitude (Karl et al., 2009).  
155 Conversely, lighter individuals may be better protected against overheating in warm  
156 environments (Munjal *et al.*, 1997; Ellers and Boggs, 2002; Pereboom and Biesmeijer, 2003).  
157 Accordingly, selection is expected to favour darker phenotypes in colder environments.  
158 However, a longitudinal cline for body color in *D. americana* is not associated with desiccation

159 resistance (Wittkopp et al., 2011). Thus, it is not clear whether change in melanisation can play a  
160 role in multiple abiotic stressors. If body melanisation is the target of selection, we may expect  
161 changes in correlated traits consistent. Laboratory selected darker and lighter lines may clarify  
162 whether such traits may coevolve or not.

163 The primary aim of the present study is to establish laboratory selected replicate lines  
164 with high and low abdominal melanisation and to analyze change after every five generation in  
165 abdominal melanisation due to direct selection response as well as correlated selection responses  
166 in physiological traits related to water stress. We assessed traits related to water conservation i.e.  
167 body water content, rate of water loss, hemolymph content and dehydration tolerance level in  
168 dark as well as light selected replicate lines of *D. melanogaster*. We further tested whether  
169 desiccation resistance show covariation with selected darker and lighter body color lines. We  
170 also provide data on realized heritability based on laboratory selected lines. This paper presents  
171 the results of a long-term artificial selection experiment having three major strengths: 1)  
172 selection was maintained for 60 generations, a greater length than most experiments of this type;  
173 2) the trait under selection varies clinally in the field, and a suite of correlated responses were  
174 also measured, giving the work a good grounding in the biology of the organism in the field; and  
175 3) the genetic variation in the trait was measured every 5 generations, a rarely implemented  
176 addition to a selection experiment.

177

## 178 *MATERIALS AND METHODS*

179

### 180 *Selection of lines for dark and light body color*



181  
182 Wild living flies of *Drosophila* species (n = 150- 200 flies per site) were collected from  
183 six localities, two lowland: 500-600m (Kalka and Parwanoo); two midland: 1200- 1400m  
184 (Kandaghat and Solan); and two highland localities: 2000- 2200m (Kasauli and Shimla) along an  
185 altitudinal transect in the western Himalayas. On an average, about 40 % were *D. melanogaster*  
186 out of each sample of wild caught flies. From each population, thirty pairs of wild caught flies  
187 were pooled to make a mass bred population which was grown for seven generation (two week  
188 cycle on standard *Drosophila* media) at a constant growth temperature of  $21 \pm 0.05$  °C and  $65 \pm 1$   
189 % relative humidity in a thermo as well as humidity controlled incubator. This mass-bred  
190 population was maintained in a population cage (n = 5000- 6000 flies) in the laboratory for seven  
191 generations before onset of selection protocol. Four stocks (P<sub>1</sub>- P) each with randomly chosen  
192 500- 600 flies were derived from this mass-bred population. For each stock, two replicate lines  
193 (control and selected) were established. Thus, we had four control and their respective four  
194 selected (S<sub>1</sub>- S<sub>4</sub>) lines, each with about 300- 350 pairs of flies.

195 For the selection regime, from each of the four selected (S<sub>1</sub>- S<sub>4</sub>) lines, forty dark and forty  
196 light female flies were selected to initiate the next generation while remaining flies were  
197 discarded. Each generation, about 300 emergent female flies per replicate were aged for 7 days  
198 prior to establishment of the next generation. It was observed that melanisation of flies did not  
199 change after two days. The flies with > 45 % and < 30 % body melanisation were sorted as  
200 darker and lighter flies for the first generation of selection. In the selection regime, each  
201 generation forty dark and forty light female flies were selected to initiate the next generation  
202 while remaining flies were discarded. These selected female flies correspond to selection  
203 intensity of about 1.40 (Falconer, 1981), this selection intensity depends only on the proportion

204 of the population included in the selected group and, provided the distribution of phenotypic  
205 values is normal. This selection procedure was followed independently for each of the mass bred  
206 five stocks. Selection protocol was followed for 60 generations resulting in dark selected line  
207 (D<sub>1</sub>, D<sub>2</sub>, D<sub>3</sub> and D<sub>4</sub>) and light selected line (L<sub>1</sub>, L<sub>2</sub>, L<sub>3</sub> and L<sub>4</sub>).

208 A replicate of each selected line (D<sub>1</sub>, D<sub>2</sub>, D<sub>3</sub>, D<sub>4</sub> and L<sub>1</sub>, L<sub>2</sub>, L<sub>3</sub>, L<sub>4</sub>) was maintained  
209 without further selection after 60<sup>th</sup> generation i.e. from 61<sup>st</sup> through 65<sup>th</sup> generation. These  
210 replicate lines were maintained with the same number of flies without any further selection  
211 regime. For relaxed lines i.e. 61<sup>st</sup> through 65<sup>th</sup> generation, a sample of 100- 150 flies of each dark  
212 and light selected line was again scored for changes in abdominal melanisation, if any.

## 215 **Quantification of melanisation: direct response to selection**

### 216 **(a) *General scoring method***

217 Body melanisation was estimated under a stereo zoom microscope (Olympus,  
218 www.olympus.com) from a lateral view of the female and male abdomen giving values ranging  
219 from 0 (no melanisation) to 10 (complete melanisation) for each of the six visible (2<sup>nd</sup> to 7<sup>th</sup>)  
220 abdominal segments (David et al., 1990). Since the abdominal segments differ in size, relative  
221 sizes (i.e. 0.86, 0.94, 1.0, 0.88, 0.67 and 0.38 for 2<sup>nd</sup> to 7<sup>th</sup> segments respectively) were  
222 multiplied with segment wise melanisation scores. Abdominal melanisation scores were  
223 weighted to the relative sizes of the respective segments. The abdomen of each fly minus viscera  
224 was mounted on a slide and total body melanisation per fly was also estimated through  
225 Biowizard image analysis software, - Dewinter Optical Inc. - (www.dewinterindia.com). Data on

226 percent melanisation were calculated as ( $\Sigma$  observed weighted melanisation scores of six  
227 abdominal segments per fly/  $\Sigma$  relative size of each abdominal segment x 10 per fly) x100.

228

### 229 **(b) Response to selection**

230 The selection response was measured at each fifth generation. Selection of abdominal  
231 melanisation was done on female flies only, but in the time course of selection males were also  
232 analyzed. For both sexes and each replicate line of control as well as selected dark and light flies  
233 60 flies were scored for abdominal melanisation at each 5<sup>th</sup> generation.

234

235

### 236 **Correlated responses to selection: analysis of stress resistance/assay**

237

238 We analyzed correlated changes in body water content, hemolymph content, desiccation  
239 resistance, rate of water loss and dehydration tolerance in selected darker and lighter replicate  
240 lines of *D. melanogaster*. We further analyzed changes in epicuticular lipids in control and  
241 selected replicates, if any. For analysis of stress resistance and epicuticular lipids, we analyzed  
242 ten replicates from each of the control (C<sub>1</sub> to C<sub>4</sub>), dark selected (D<sub>1</sub> to D<sub>4</sub>) and light selected (L<sub>1</sub>  
243 to L<sub>4</sub>) lines of *D. melanogaster*.

244

### 245 **a) Desiccation resistance**

246 Desiccation resistance was measured as time to lethal dehydration effect under dry air in  
247 ten replicates of female and male individuals of each of the control (C<sub>1</sub> to C<sub>4</sub>), dark selected (D<sub>1</sub>  
248 to D<sub>4</sub>) and light selected (L<sub>1</sub> to L<sub>4</sub>) lines. 10 male and female individuals were isolated in dry

249 plastic vials which contained 2 g of silica gel at the bottom of each vial and was covered with a  
250 disc of plastic foam piece. Finally, such vials with foam plugs were placed in a desiccator  
251 chamber (Secador electronic desiccators cabinet; www.tarson.com) which maintains 6-8%  
252 relative humidity. Number of immobile flies was counted at every 1h interval. The time period to  
253 lethal desiccation ( $LT_{100}$ ) effect in dry air was recorded.

254

#### 255 ***b) Basic measures of water balance***

256 In order to estimate total body water content, rate of water loss and dehydration tolerance  
257 (%), 10 flies of each of the C, D and L (10 replicate each) were used. First, the flies were  
258 weighed on Sartorius microbalance (Model- CPA26P; with precision 0.001 mg) and then  
259 reweighed after drying at 60 °C overnight. Total body water content was estimated as the  
260 difference between masses before and after desiccation stress of 8h at 6- 8% relative humidity,  
261 and water loss was calculated as: (initial body mass- body mass after 8h desiccation stress)/  
262 initial body mass x 8; and the values were given in  $\mu\text{g h}^{-1}$ . Dehydration tolerance was estimated  
263 as the percentage of total body water lost at death due to desiccation (until death) and was  
264 calculated by the formula (wet body mass – mass at death) / (wet body mass – dry body mass) x  
265 100.

266 To measure hemolymph volume, blotting assays were conducted. Ten replicates of 7 days  
267 old male and female individual were anesthetized and weighed as a group. The abdomen of each  
268 was gently torn with surgical forceps, and hemolymph was blotted from the opening with a piece  
269 of Kimwipe® slightly moistened with isotonic saline. Within a maximum of 10 min, 10 blotted  
270 flies were reweighed as a group and dried for 1h at 60 °C and weighed a third time. Hemolymph  
271 volume was estimated from the reduction in mass following blotting.

272

273 ***c) Response of cuticular lipids to selection***

274 For estimation of cuticular lipid mass per fly, individual flies in ten replicates per  
275 replicate line were dried overnight at 60 °C to get constant dry mass i.e. devoid of body water.  
276 Such dried flies were kept in HPLC-grade hexane for 1h; thereafter the flies were removed from  
277 the solvent and were again dried at room temperature and finally reweighed. The sartorius  
278 microbalance (CPA26P, www.sartorius.com) with precision upto 0.001mg ensured accuracy.  
279 For each individual fly, cuticular lipid mass in mg was estimated per unit surface area (surface  
280 area scales to 2/3 power of the wet body mass) as: difference between initial dry weight and dry  
281 weight after solvent treatment / initial dry weight\*surface area (where area was expressed in cm<sup>2</sup>  
282 and wet body mass in mg).

283

284

285

**Statistical analyses**

286 The response to selection was analyzed by computing realized heritability over every  
287 fifth generation of selection in both darker and lighter selected replicate lines. The realized  
288 heritability for cuticular melanisation was calculated for each line by plotting the mean  
289 melanisation score for each generation against the cumulative selection differential. The  
290 expected selection differential was calculated as the deviation of the mean cuticular melanisation  
291 score of the selected individuals in each generation from the population mean before selection.  
292 This was then summed each generation to give the cumulative selection differential. The realized  
293 heritability ( $h^2$ ) was then calculated from the slope of the regression of mean color score ( $R$ )  
294 against the cumulative selection differential ( $S$ ), as  $h^2 = R/S$  (Falconer and Mackay, 1996). To

295 compare control and selected dark and light replicate lines analysis of variance (ANOVA) was  
296 used, with replicate line (4 replicate each control, dark and light group x 10 replicate each).  
297 Mean  $\pm$  s.d values of replicates were used for tabular and figure illustrations. Statistica (Statsoft  
298 Inc., Release 5.0, Tulsa, OK, USA) was used for calculations as well as illustrations.

299

300

301

## RESULTS

302

### *Response to selection: changes in abdominal melanisation in dark and light selected lines*

304

305 Selection was initiated from mass-bred populations having high variability for abdominal  
306 melanisation ( $m \pm$  s.d. =  $41.39 \pm 13.12$ , Fig. 1A). Selection for abdominal melanisation in *D.*  
307 *melanogaster* for 60 generations resulted in a decrease of around 14 fold (ANOVA; females:  $p <$   
308  $0.0001$ ; males:  $p < 0.0001$ ; Table 1) in light selected strains; and 1.6 fold increase in D selected  
309 strains (ANOVA; females:  $p < 0.0001$ ; males:  $p < 0.0001$ ; Table 1). A plot of the response to  
310 selection as a function of cumulative selection differential (Fig. 1B) indicated that the response  
311 was asymmetric: divergence from unselected controls was faster and greater in lighter selected  
312 lines than dark selected lines.

313 Realized heritabilities were estimated from the regression of selection response on  
314 cumulative selection differential. The regression of cumulative selection differential on response  
315 was highly significant for each of the dark and light selected lines giving heritability estimates  
316 ( $h^2 \pm$  SE) for cuticular melanisation  $0.46 \pm 0.03$  for dark selected lines (mean value of five

317 replicates) and  $0.39 \pm 0.02$  for light selected lines (Fig 1B). For abdominal melanisation, females  
318 responded quickly to selection. The laboratory selection was done on females only but males  
319 were also found to respond to selection for changes in abdominal melanisation (Fig 2A). Dark  
320 selected females showed ~87 % melanisation, while males exhibited ~88 % melanisation (Fig.  
321 2A). However, in light selected strains, females and males were very light (about 3%  
322 melanisation only, Fig 2A). The replicate selected lines reached significantly different final %  
323 melanisation, and the complete lack of response to relaxed selection. Further, the variability in  
324 each D and L selected strains was quite low (dark:  $m \pm s.d = 87.12 \pm 0.79$ ; light =  $3 \pm 0.21$ ).

325

### 326 *Physiological assays*

327

328 Male and female flies were tested for changes in body water content (Table 1) and the  
329 analysis showed a significant line term in the ANOVA ( $p < 0.001$ ). Darker selected lines have  
330 around 10.0 % more water content, whereas in light selected replicates body water content  
331 reduced by ~13.0% as compared with their unselected control. Figure 2 (B-D) illustrates a  
332 comparison of desiccation-related traits in selected darker and lighter body color strains as  
333 compared with unselected control lines. For control and selected strains of *D. melanogaster*,  
334 grown at 21° C, there is lack of differences in cuticular lipid mass. In contrast, we found  
335 significant difference in the desiccation resistance of these two selected darker and lighter strains  
336 (Table 2, Fig. 2B) and significant difference in their rate of water loss i.e. 0.3% / hr (1.5% / hr in  
337 darker versus 1.8% / hr in lighter strains; Fig. 2C). However, the level of dehydration tolerance is

338 much higher in darker (~82.32%) than lighter strains (~22%) as compared with control lines  
339 (~50%; Table 2; Fig. 3D).

340

### 341 *Correlated responses to selection*

342

343 For any trait, consistent bidirectional changes in selected lines relative to their unselected  
344 control lines are due to the effect of selection (Lynch, 1980) and indicate that abdominal  
345 melanisation and the co-responding traits are influenced by some of the same genes (i.e. show  
346 genetic covariance; Falconer 1981). 60 generations of artificial selection on abdominal  
347 melanisation produced consistent bidirectional selection, correlated response in body water  
348 content, desiccation resistance, rate of water loss, dehydration tolerance (Table 1; Fig 2 B-D) and  
349 mean trait values increased significantly for body water content, desiccation resistance and  
350 dehydration tolerance in dark selected replicate lines, whereas rate of water loss showed a  
351 negative correlated response. However, in light selected replicate lines body water content,  
352 desiccation resistance and dehydration tolerance decreased significantly; and rate of water loss  
353 showed a positive correlated response (Table 1; Fig. 2 B-D).

354 Direct selection of cuticular melanisation impact desiccation resistance significantly (Fig.  
355 2). Comparison of direct and indirect selection responses provide a clearer view of melanism –  
356 desiccation correlation hypothesis. Replicates selected for higher melanisation showed higher  
357 desiccation resistance and reduced rate of water loss, whereas desiccation survival decreased and  
358 rate of water loss increased significantly in replicates selected for low cuticular melanisation as  
359 compared with control (Table 2). Selection for cuticular melanisation had a significant effect on



360 water balance and desiccation resistance. Darker lines had significantly higher desiccation  
361 resistance ( $p < 0.0001$ ) than control flies, whereas lighter ones have 2 fold decreases in  
362 desiccation survival. Similar effects were observed for rate of water loss ( $p < 0.0001$ ). For body  
363 water content, there were non significant changes in selected vs. control replicates ( $p < 0.23$ ).  
364 Further, we observed no changes in wing length (as a measure of body size) due to selection ( $F_7$ ,  
365  $\eta^2 = 5.01$  ns).

366 Flies were analyzed for cuticular lipids in control as well as selected replicates to  
367 examine their response towards selection and relation with desiccation resistance. Cuticular  
368 lipids do not change in response to selection (Fig. 3D, Table 2). There was a non significant  
369 difference for cuticular lipids between the control lines ( $p < 0.07$ ) and also between the selected  
370 lines ( $p < 0.20$ ) when tested by ANOVA. Changes in desiccation and changes in water loss rate  
371 are significantly correlated with selection in cuticular melanisation (Fig. 4, Table 3). Cuticular  
372 lipids do not respond to selection and were not correlated with increasing desiccation resistance  
373 and water balance (Table 3).

374

375

376

## DISCUSSION

377

378 *D. melanogaster* exhibits considerably high variation in abdominal melanisation in  
379 natural populations. Laboratory selected dark and light body color strains of *D. melanogaster*  
380 differ significantly in abdominal melanisation. Our study shows that there is a great deal of

381 genetic variation in abdominal melanisation in *D. melanogaster*, as evidenced by consistent,  
382 rapid and substantial response to selection for high and low melanisation phenotypes. For body  
383 melanisation, we found a rapid response to laboratory selection. Interestingly, selection produced  
384 both light females as well as light males, in contradiction with the well known sexual  
385 dimorphism of body melanisation in *D. melanogaster*. The replicate selected lines reached  
386 significantly different final % melanisation, and the complete lack of response to relaxed  
387 selection suggests that different combinations of alleles affecting abdominal melanisation may  
388 have become fixed in the different selected lines. Although, the external appearance of our  
389 selected strains is different from typical wild populations, we detected no statistically significant  
390 effects of melanisation on basic morphometric traits such as wing length, thorax length and wing  
391 width ( $p < 0.12ns$ ). However, dark and light selected strains differ significantly in wet body mass  
392 ( $p < 0.001$ ).

393 We found an asymmetric response to selection, in lines selected for dark and light  
394 abdominal melanisation in *D. melanogaster* (Fig 1B). Asymmetric responses to selection are a  
395 common finding in selection experiments. The reasons given by Falconer and Mackay (1996)  
396 involve experimental artifacts (random drift, inbreeding depression and unmeasured natural or  
397 sexual selection acting during the experiment) as well as a multitude of potential genetic causes  
398 (genetic asymmetry, presence of major genes, scalar asymmetry). Random drift is unlikely to  
399 explain the present results because of the consistency of response between replicates. Inbreeding  
400 depression is also unlikely because the mean of the unselected control line did not decline.  
401 However, we can not at this point rule out the genetic causes (major genes, directional  
402 dominance or genetic asymmetry); it is possible that the asymmetric response is explained by  
403 scalar asymmetry: high phenotypic values might be particularly subject to environmental

404 influence (e.g condition-dependency, rearing conditions) and the extreme values an artifact of  
405 laboratory rearing. One interesting possibility is that the asymmetry results from the previous  
406 action of selection in the base population. Favorable alleles are expected to have frequencies  
407 above their symmetrical points (Falconer and Mackay, 1996).

408 Artificial selection experiments are longer in duration and correlations are limited to the  
409 trait being selected, but they have the advantage of directly revealing patterns of responses and  
410 co- responses to a specified selection regimen. Thus, they can provide an independent test for the  
411 presence of significant patterns of genetic variation and co- variation in a given environment.  
412 Due to the physiological relationship between melanisation and desiccation resistance, we  
413 predicted that selection for melanisation would result in a correlated increase and decrease in  
414 desiccation resistance of *D. melanogaster*. We found that desiccation resistance was higher in  
415 dark selected strains and was significantly low in light selected strains (Fig 1C). For adaptations  
416 to drier habitats, the function of cuticular lipids in reducing cuticular water loss is well known in  
417 different insect taxa from deserts (Hadley, 1994). However, some studies have shown the role of  
418 melanisation in reducing cuticular water loss in *Drosophila* species (Parkash et al., 2008b,c).  
419 Associations between pigmentation and desiccation resistance was initially proposed by Kalmus  
420 (1941). Fraenkel and Rudall (1940) and Pryor (1940) concluded that the darkening and  
421 hardening of the cuticle are due to the same biochemical processes, which may involve cross-  
422 linking of proteins with melanin. In the present work, we have investigated effects of  
423 bidirectional selection of body melanisation selection on correlated traits. For *D. melanogaster*,  
424 rapid response to direct selection of melanisation confirms the existence of substantial additive  
425 genetic variation for this trait. Populations of *D. melanogaster*, therefore, have the potential to  
426 undergo rapid genetic changes when they are exposed to one or the other selective environment.

427 The correlated responses to selection indicate that at least some of the genes which contribute to  
428 variation in abdominal melanisation have pleiotropic effects on other traits. Specifically, body  
429 melanisation shares positive additive genetic covariance with body water content, hemolymph  
430 content desiccation resistance and dehydration tolerance and it shares negative genetic  
431 covariance with rate of water loss. Epicuticular lipids, however, do not respond to selection.

432 Another problem is to differentiate water proofing role of cuticular melanisation versus  
433 cuticular tanning (hardening) in *D. melanogaster*. Different cuticular components may affect  
434 cuticular transpiration in insects (Chapman, 1998). Darker cuticle achieves its color due to  
435 deposition of melanin granules (polymers of dopa and other tyrosine derivatives; True, 2003).  
436 Like cuticular lipids, melanin is also hydrophobic and therefore may reduce cuticular  
437 permeability. It has been suggested that the darkening and hardening of cuticle result due to  
438 cross-linking of cuticular proteins with melanin (Pryor, 1940; Fraenkel and Rudall, 1940;  
439 Hopkins and Kramer, 1992). Thus, melanisation and sclerotization pathways (tanning) could be  
440 related because in the insects, harder body parts are generally darker. In the present study, we  
441 have not considered the role of sclerotization. However, further studies are needed to  
442 differentiate the effects of cuticular melanisation and cuticular tanning for waterproofing  
443 function in *Drosophila* species and in insects in general.

444 Insect cuticle is a complex structure and its components vary greatly between populations  
445 and species (Rajpurohit et al., 2008). Changes in body melanisation have been shown to affect  
446 cuticular permeability in some *Drosophila* species (Parkash et al., 2008b,c). According to  
447 melanisation–desiccation hypothesis, darker flies of *D. melanogaster* are abundant in cooler  
448 uplands while lighter flies are predominant in foothills (Parkash et al., 2008c). The laboratory  
449 selected desiccationresistant and sensitive strains of *D. melanogaster* have shown similar

450 amounts of cuticular lipid mass (Gibbs et al., 1997); and there is also lack of differences in the  
451 amount of cuticular lipid mass in northern versus southern population of *D. melanogaster*  
452 (Parkash et al., 2008a). However, in two cases (*Melanoplus sanguinipes* and *Z. indianus*), there  
453 are significant intrapopulation differences in the amount of cuticular lipid mass per cm<sup>2</sup> (Rourke,  
454 2000; Parkash et al., 2008a; Parkash et al., 2011)

455 The present work provides good evidence that the associations between both desiccation  
456 resistance and the rate of water loss with cuticular melanisation in *D. melanogaster* populations  
457 from India have a genetic basis, which has been suggested by population comparisons in field  
458 and lab populations. This is the first experiment to explore these associations with a long term  
459 artificial selection experiment. However, pigmentation clines have been reported in *Drosophila*  
460 (Parkash et al., 2008), and desiccation resistance is often proposed as an adaptive benefit of  
461 increased melanization. We tested the association between pigmentation and desiccation in *D.*  
462 *melanogaster* using selection and found that there was a causative relationship between  
463 melanisation and rate of water loss, as selection for both high and low melanin resulted in a  
464 correlated response to selection in both desiccation resistance and water balance (however, note  
465 that Wittkopp et al., 2011. performed a similar experiment using *D. americana* and *D.*  
466 *novamexicana*, and found no effect of pigmentation genotype on desiccation resistance.

467 We observed a substantial increase in both male and female survival to desiccation stress  
468 following selection for abdominal melanisation. There was a sexual dimorphism for abdominal  
469 melanisation as well as desiccation resistance at the onset of our selection regime, but at the 60<sup>th</sup>  
470 generation of selection these differences vanishes. The presence of similar resistant levels in  
471 males and females implies that there is a common genetic basis between the sexes underlying the  
472 selection responses. Figure 2 represents a genetic association between traits involved in

473 correlated responses to selection. Selection was associated with an increase in wet weight. This  
474 observation is consistent with lines directly selected for desiccation resistance (Gibbs et al.,  
475 1997) and in lines selected indirectly in response to very mild desiccation stress (Kennington et  
476 al., 2003), but not in other direct selected lines (Bubliy and Loeschcke, 2005; Hoffmann and  
477 Parson, 1989). The changes in correlated trait such as desiccation survival with melanisation of  
478 selected replicates were independent of body size. The absence of changes in body size suggests  
479 that changes in the surface to volume ratio were not involved in increased desiccation tolerance.  
480 There were also correlated responses in the weight loss of flies, suggesting that selected strains  
481 had a different rate of water loss through the cuticle.

482         Selection experiments are vital tools of evolutionary biology and the results of nearly a  
483 century's worth of selection experiments have helped establish the genetic component of  
484 evolutionary theory (Provine, 1971; Falconer, 1992). In addition, selection experiments have  
485 provided stocks that have been useful for many other topics, from estimating mutation rates to  
486 understanding the molecular, biochemical, and physiological foundations of trait variation (Hill  
487 and Caballero, 1992; Mackay, 2001; Conner, 2003; Garland, 2003). The association between  
488 melanisation and other correlated traits has been well documented in natural populations of *D.*  
489 *melanogaster* (Parkash et al., 2008), but such associations have not been analyzed following  
490 artificial selection experiment of abdominal melanisation. Selection experiments in other  
491 drosophilids and insect have detected patterns of genetic covariance between traits (Pitnick and  
492 Miller, 2000, Nunney, 1996, Beldade et al., 2002). The results should be especially informative,  
493 since the application of quantitative- genetic theory to the evolution of phenotypic differences  
494 between populations assumes the pattern of genetic variances and covariances remains relatively  
495 constant across evolving populations (Lande, 1982; Arnold, 1981).

496

497

## CONCLUSIONS

498 We detected through the analysis of correlated responses to direct selection on abdominal  
499 melanisation, a pattern of genetic co-variation among desiccation related traits. A direct selection  
500 for cuticular melanisation has selected correlated traits (water balance related traits) in *D.*  
501 *melanogaster*. The evidence for correlated traits is based on trait correlation analysis i.e. darker  
502 flies have lower rate of water loss which confers greater desiccation resistance. In contrast,  
503 higher rate of water loss in lighter flies sustains lower desiccation tolerance. Results of this study  
504 therefore indicate the potential for abdominal melanisation evolution to facilitate or constrain the  
505 evolution of desiccation resistance in *Drosophila melanogaster*. Still, the generality of these  
506 results deserves further investigations.

507

508

## ACKNOWLEDGEMENTS

509 We are indebted to the reviewers and the editor for several helpful comments that improved the  
510 manuscript.

511

512

## FUNDING

513 S.R. (INSA/ INSPIRE Faculty Fellow) and B.K. (Senior Research Fellow) are grateful to  
514 Department of Science and Technology, New Delhi for supporting their research work through  
515 DST- INSA/INSPIRE faculty fellow Project (IFA- 11LSBM-08). Financial assistance as  
516 University Research Fellowship to K.D. is acknowledged.

517

518 **REFERENCES**

519

520 **Anderson, A. R., Hoffmann, A. A. and McKechnie, S. W.** (2005). Response to selection for  
521 rapid chill-coma recovery in *Drosophila melanogaster*: physiology and life-history  
522 traits. *Genet. Res.* **85**: 15–22.

523 **Angilletta, M. J.** (2009). *Thermal Adaptation: A Theoretical and Empirical Synthesis*. Oxford  
524 University Press, Oxford, UK.

525 **Arnold, S. J.** (1981). Behavioral variation in natural populations. I. Phenotypic, genetic, and  
526 environmental correlations between chemoreceptive responses to prey in the garter snake,  
527 *Thamnophis elegans*. *Evolution* **35**: 489-509.

528 **Beldade, P., Koops, K. and Brakefield, P. M.** (2002). Developmental constraints versus  
529 flexibility in morphological evolution. *Nature* **416**: 844-847

530 **Bertoli, C. I., Scannapieco, A. C., Sambucetti, P. and Norry, F. M.** (2009). Direct and  
531 correlated responses to chill-coma recovery selection in *Drosophila buzzatii*. *Entomol.*  
532 *Exp. Appl.* **134**: 154–159.

533 **Bowler, K. and Terblanche, J. S.** (2008). Insect thermal tolerance: what is the role of ontogeny,  
534 ageing and senescence? *Biol. Rev.* **83**: 339–355.

535 **Bubliy, O. A., and Loeschke, V.** (2005). Correlated responses to selection for stress resistance  
536 and longevity in a laboratory population of *Drosophila melanogaster*. *J. Evol. Biol.* **18**:  
537 789-803.



- 538 **Capy, P., David, J. R. and Robertson, A.** (1988). Thoracic trident pigmentation in natural  
539 populations of *Drosophila simulans*: a comparison with *D. melanogaster*. *Heredity*,  
540 **61(2)**: 263–268.
- 541 **Chapman, R. F.** (1998). *The Insects: Structure and Function*. Cambridge University Press,  
542 Cambridge, United Kingdom.
- 543 **Chippindale, A. K., Chu, T. J. F. and Rose, M. R.** (1996). Complex trade-offs and the  
544 evolution of starvation resistance in *Drosophila melanogaster*. *Evolution* **50**: 753–766.
- 545 **Chippindale, A. K., Gibbs, A. G., Sheik, M., Yee, K. J., Djawdan, M., Bradley, T. J. and**  
546 **Rose, M. R.** (1998). Resource acquisition and the evolution of stress resistance  
547 in *Drosophila melanogaster*. *Evolution* **52**: 1342–1352.
- 548 **Clusella Trullas, S., van Wyk, J. H. and Spotila, J. R.** (2007). Thermal melanism in  
549 ectotherms. *J. Therm. Biol.* **32(5)**: 235–245.
- 550 **Conner, J. K.** (2003). Artificial selection: A powerful tool for ecologists. *Ecology* **84**: 1650-  
551 1660.
- 552 **da Cunha, A.B.** (1949). Genetic analysis of the polymorphism of color pattern in *Drosophila*  
553 *polymorpha*. *Evolution* **3**: 239-251.
- 554 **Das, A., Mohanty, S. and Parida, B. B.** (1994). Abdominal pigmentation and growth  
555 temperature in Indian *Drosophila melanogaster*: evidence for genotype–environment  
556 interaction. *J. Biosci.* **19(2)**: 267–275.
- 557 **David, J. R., Capy, P. and Gauthier, J. P.** (1990). Abdominal pigmentation and growth  
558 temperature in *Drosophila melanogaster*: similarities and differences in the norms of  
559 reaction of successive segments. *J. Evol. Biol.* **3(5-6)**: 429–445.

- 560 **David, J. R., Capy, P., Payant, V. and Tsakas, S.** (1985). Thoracic trident pigmentation in  
561 *Drosophila melanogaster*: differentiation of geographic populations. *Genet. Sel. Evol.*  
562 **17(2)**: 211–222.
- 563 **De Jong, P. W., Gussekloo, S. W. S. and Brakefield, P. M.** (1996). Differences in thermal  
564 balance, body temperature and activity between non-melanic and melanic two-spot  
565 ladybird beetles (*Adalia bibunctata*) under controlled conditions. *J. Exp. Biol.* **199**: 2655-  
566 2666.
- 567 **DeWitt, T. J. and Scheiner, S. M.** (Ed). 2004. *Phenotypic plasticity: functional and conceptual*  
568 *approaches*. Oxford University Press, New York.
- 569 **Djawdan, M., Chippendale, A. K., Rose, M. R. and Bradley, T. J.** (1998). Metabolic reserves  
570 and evolved stress resistance in *Drosophila melanogaster*. *Physiol Zool*, **71**: 584–594. |
- 571 **Dombeck I. and Jaenike, J.** (2004). Ecological genetics of abdominal pigmentation in  
572 *Drosophila falleni*: a pleiotropic link to nematode parasitism. *Evolution* **58**: 587-96.
- 573 **Edney, E. B.** (1977). *Water balance in land arthropods*. Springer, Berlin
- 574 **Ellers, J. and Boggs, C. L.** (2002). The evolution of wing color in *Colias* butterflies:  
575 heritability, sex-linkage, and population divergence. *Evolution* **56**: 836-540.
- 576 **Ellers, J. and Boggs, C. L.** (2004). Functional ecological implications of intra specific  
577 differences in wing melanism in *Colias* butterflies. *Biol. J. Linn. Soc.*, **82**, 79-87.
- 578 **Falconer, D. S.** (1981). *Introduction to Quantitative Genetics*, Longman, London, UK.
- 579 **Falconer, D. S. and Mackay, T. F. C.** (1996). *Introduction to quantitative genetics*, 4th edition.  
580 Longman, Harlow, UK.
- 581 **Falconer, D. S.** (1992). Early selection experiments. *Ann. Rev. Genet.* **26**: 1-14.

- 582 **Folk, D. G., Zwollo, P., Rand, D. M. and Gilchrist, G. W.** (2006). Selection on knockdown  
583 performance in *Drosophila melanogaster* impacts thermotolerance and heat-shock  
584 response differently in females and males. *J. Exp. Biol.* **209**: 3964–3973
- 585 **Forsman, A.** (2000). Some like it hot: intra-population variation in behavioral thermoregulation  
586 in color-polymorphic pygmy grasshoppers. *Evol. Ecol.* **14(1)**: 25–38.
- 587 **Fraenkel, G. and Rudall, K. M.** (1940). A study of the physical and chemical properties of the  
588 insect cuticle. *Proc. R. Soc. Lond. Ser. B* **129**: 1–35.
- 589 **Garland, T.** (2003). Selection experiments: An underutilized tool in biomechanics and  
590 organismal biology. In V. L. Bels, J.-P. Gasc, and A. Casinos (eds.), *Vertebrate*  
591 *biomechanics and evolution*, pp. 23–56. Scientific Publishers Ltd, Oxford.
- 592 **Gibbs, A. G. and Matzkin, L. M.** (2001). Evolution of water balance in the genus *Drosophila*.  
593 *J. Exp. Biol.* **204**, 2331-2338.
- 594 **Gibbs, A. G. and Rajpurohit, S.** (2010). *Water-proofing properties of cuticular lipids*. In:  
595 Insect Lipids; Biology, Biochemistry and Chemical Biology G.J. Blomquist and A.G.  
596 Bagnères, eds. pp. 100-120.
- 597 **Gibbs, A. G., Chippindale, A. K. and Rose, M. R.** (1997). Physiological mechanisms of  
598 evolved desiccation resistance in *Drosophila melanogaster*. *J. Exp. Biol.* **200**: 1821-1832.
- 599 **Gibbs, A. G., Fukuzato, F. and Matzkin, L. M.** (2003). Evolution of water conservation  
600 mechanisms in desert *Drosophila*. *J. Exp. Biol.* **206**, 1183-1192.
- 601 **Gibbs, A. G., Louie, A. K. and Ayala, J. A.** (1998). Effects of temperature on cuticular lipids  
602 and water balance in a desert *Drosophila*: is thermal acclimation beneficial? *J. Exp. Biol.*  
603 **201**: 71–80

- 604 **Gibbs, A. G., Louie, A. K. and Ayala, J. A.** (1998). Effects of temperature on cuticular lipids  
605 and water balance in a desert *Drosophila*: Is thermal acclimation beneficial? *J. Exp.*  
606 *Biol.* **201**: 71-80.
- 607 **Gilchrist, G. W. and Huey, R. B.** (1999). The direct response of *Drosophila melanogaster* to  
608 selection on knockdown temperature. *Heredity* **83**: 15-29
- 609 **Gomez, F. H., Bertoli, C. I., Sambucetti, P., Scannapieco, A. C. and Norry, F. M.** (2009).  
610 Heat induced hormesis in longevity as correlated response to thermal-stress selection in  
611 *Drosophila buzzatii*. *J. Therm. Biol.* **34**: 17–22.
- 612 **Hadley, N. F.** (1977). Epicuticular lipids of the desert tenebrionid beetle, *Eleodes armatus*:  
613 seasonal and acclimatory effects on chemical composition. *Insect Biochem.* **7**: 227–283
- 614 **Hadley, N. F.** (1994). *Water Relations of Terrestrial Arthropods*. San Diego, CA: Academic  
615 Press.
- 616 **Hadley, N. F. and Schultz, T. D.** (1987). Water loss in three species of tiger beetles (*Cicindela*):  
617 correlations with epicuticular hydrocarbons. *J. Insect Physiol.* **33**: 677–682.
- 618 **Harshman, L. G. and Hoffmann, A. A.** (2000). Laboratory selection experiments using  
619 *Drosophila*: what do they really tell us? *Trends Ecol. Evol.* **15**: 32–36.
- 620 **Harshman, L. G., Hoffmann, A. A. and Clark, A. G.** (1999). Selection for starvation  
621 resistance in *Drosophila melanogaster*: physiological correlates, enzyme activities and  
622 multiple stress responses. *J Evol Biol*, **12**: 370–379.
- 623 **Hill, W. G., and Caballero, A.** (1992). Artificial selection experiments. *Ann. Rev. Ecol.*  
624 *Syst*, **23**: 287-310.

- 625 **Hoffmann, A. A. and Parsons, P. A.** (1989a). An integrated approach to environmental stress  
626 tolerance and life-history variation: desiccation tolerance in *Drosophila*. *Biol. J. Linn.*  
627 *Soc.* **37**: 117–135.
- 628 **Hoffmann, A. A. and Parsons, P. A.** (1989b). Selection for increased desiccation resistance  
629 in *Drosophila melanogaster*: additive genetic control and correlated responses for other  
630 stresses. *Genetics* **122**: 837–845.
- 631 **Hoffmann, A. A. and Parsons, P. A.** (1993). Direct and correlated responses to selection for  
632 desiccation resistance – a comparison of *Drosophila melanogaster* and *D. simulans*. *J.*  
633 *Evol. Biol.* **6**: 643–657.
- 634 **Hoffmann, A. A. and Willi, Y.** (2008). Detecting genetic responses to environmental change.  
635 *Nat. Rev. Genet.* **9**: 421–432.
- 636 **Hoffmann, A. A., Sørensen, J. G. and Loeschcke, V.** (2003). Adaptation of *Drosophila* to  
637 temperature extremes: bringing together quantitative and molecular approaches. *J.*  
638 *Thermal Biol.* **28**, 175-216.
- 639 **Hopkins, T. L. and Kramer, K. L.** (1992). Insects cuticle sclerotization. *Annu. Rev. Entomol.*  
640 **37**: 273–302.
- 641 **Huey, R. B., Partridge, L. and Fowler, K.** (1991). Thermal sensitivity of *Drosophila*  
642 *melanogaster* responds rapidly to laboratory natural selection. *Evolution* **45**: 751–756.
- 643 **Kalmus, H.** (1941). The resistance to desiccation of *Drosophila* mutants affecting body colour.  
644 *Proc. R. Soc. Biol. Sci. B.* **130**: 185–201.
- 645 **Karl, I., Sørensen, J. G., Loeschcke, V. and Fischer, K.** (2009). HSP70 expression in the  
646 copper butterfly *Lycaena tityrus* across altitudes and temperatures. *J. Evol. Biol.* **22**: 172–  
647 178

648 **Kennington, W. J., Killeen, J. R., Goldstein, D. B., and Partridge, L.** (2003). Rapid  
649 laboratory evolution of adult wing area in *Drosophila melanogaster* in response to  
650 humidity. *Evolution* **57**: 932-936.

651 **Lande, R.** (1982). A quantitative genetic theory of life history evolution. *Ecology* **63**: 607–615.

652 **Lynch, C. B.** (1980). Response to divergent selection for nesting behavior in *Mus musculus*.  
653 *Genetics* **96**: 757–765

654 **Mackay, T. F. C.** (2001). Quantitative trait loci in *Drosophila*. *Nature Rev. Genet.* **2**: 11-20.

655 **Majerus, M. E. N.** (1998). *Melanism: Evolution in Action*. Oxford, United Kingdom: Oxford  
656 University Press.

657 **Mori, N. and Kimura, M. N.** (2008). Selection for rapid and slow recovery from chill- and heat-  
658 coma in *Drosophila melanogaster*. *Biol. J. Linn. Soc.* **95**: 72–80.

659 **Munjal, A. K., Karan, D., Gibert, P., Moreteau, B., Parkash, R., and David, J. R.** (1997).  
660 Thoracic trident pigmentation in *Drosophila melanogaster*: latitudinal and altitudinal  
661 clines in Indian populations. *Genet. Sel. Evol.* **29(5)**: 601–610.

662 **Napp Martinez, M., and Cordeiro, A. R.** (1970). Modifiers of color pattern genes  
663 in *Drosophila polymorpha*. *Genetics* **64**: 573-587.

664 **Norry, F. M, Gomez, F. H. and Loeschcke, V.** (2007). Knockdown resistance to heat stress and  
665 slow recovery from chill coma are genetically associated in a quantitative trait locus  
666 region of chromosome 2 in *Drosophila melanogaster*. *Mol. Ecol.* **16**: 3274–3284.

667 **Nunney, L.** (1996). The response to selection for fast larval development in *Drosophila*  
668 *melanogaster* and its effect on adult weight: An example of a fitness trade-  
669 off. *Evolution* **50**: 1193-1204.

- 670 **Ottenheim, M. M., Wertheim, B., Holloway, G. J. and Brakefield, P. M.** (1999). Survival of  
671 colour-polymorphic *Eristalis arbustorum* hoverflies in semi-field conditions. *Funct. Ecol.*  
672 **13(1):** 72–77.
- 673 **Parkash, R. and Munjal, A. K.** (2000). Evidence of independent climatic selection for  
674 desiccation and starvation tolerance in Indian tropical populations of *D. melanogaster*.  
675 *Evol. Ecol. Res.* **2:** 685–699
- 676 **Parkash, R., Chahal, J., Sharma, V. and Dev, K.** (2012). Adaptive associations between total  
677 body color dimorphism and climatic stress related traits in a stenothermal circumtropical  
678 *Drosophila* species. *Insect Sci.* **19(2):** 247–262.
- 679 **Parkash, R., Chahal, J., Sharma, V., and Dev, K.** (2011). Adaptive associations between total  
680 body color dimorphism and climatic stress related traits in a stenothermal circumtropical  
681 *Drosophila* species. *Insect Sci.* **18:** doi: 10.1111/j.1744-7917.2011.01426.x
- 682 **Parkash, R., Kalra, B. and Sharma, V.** (2008a). Changes in cuticular lipids, water loss and  
683 desiccation resistance in a tropical drosophilid: analysis of within population variation.  
684 *Fly* **2:**189–197
- 685 **Parkash, R., Kalra, B. and Sharma, V.** (2010a). Impact of body melanisation on contrasting  
686 levels of desiccation resistance in a circumtropical and a generalist *Drosophila* species.  
687 *Evol. Ecol.* **24:** 207–225
- 688 **Parkash, R., Rajpurohit, S. and Ramniwas, S.** (2008). Changes in body melanisation and  
689 desiccation resistance in highland vs. lowland populations of *D. melanogaster*. *J. Insect*  
690 *Physiol.* **54:** 1050-1056

- 691 **Parkash, R., Rajpurohit, S. and Ramniwas, S.** (2008b). Changes in body melanisation and  
692 desiccation resistance in highland vs. lowland populations of *Drosophila melanogaster*.  
693 *J. Insect Physiol.* **54**: 1050–1056
- 694 **Parkash, R., Ramniwas, S., Rajpurohit, S. and Sharma, V.** (2008c). Variations in body  
695 melanisation impact desiccation resistance in *Drosophila immigrans* in Western  
696 Himalayas. *J. Zool.* **276**: 219–227
- 697 **Parkash, R., Sharma, V. and Kalra, B.** (2010b), Correlated changes in thermotolerance traits  
698 and body color phenotypes in montane populations of *Drosophila melanogaster*: analysis  
699 of within- and between-population variations. *J. Zool.* **280**: 49–59.
- 700 **Parkash, R., Singh, S. and Ramniwas, S.** (2009). Seasonal changes in humidity level in the  
701 tropics impact body color polymorphism and desiccation resistance in *Drosophila*  
702 *jambulina*– Evidence for melanism–desiccation hypothesis. *J. Insect Physiol.* **55**: 358–  
703 368.
- 704 **Pereboom, J. J. M. and Biesmeijer, J. C.** (2003). Thermal constraints for stingless bee  
705 foragers: the importance of body size and coloration. *Oecologia* **137**: 42–50.
- 706 **Pitnick, S., and Miller, G. T.** (2000). Correlated response in reproductive and life history traits  
707 to selection on testis length in *Drosophila hydei*. *Heredity* **84**: 416-426.
- 708 **Pool, J. E., and Aquadro, C. F.** (2007). The genetic basis of adaptive pigmentation variation in  
709 *Drosophila melanogaster*. *Mol. Ecol.* **16**(14): 2844-2851.
- 710 **Provine, W. B.** (1971). *The origins of theoretical population genetics*. Univ. of Chicago Press,  
711 Chicago
- 712 **Pryor, M. G. M.** (1940). On the hardening of the cuticle of insects. *Proc. R. Soc. Biol. Sci. B.*  
713 **128**: 393–407.



- 714 **Rajpurohit, S., Parkash, R. and Ramniwas, S.** (2008). Body melanisation and its adaptive role  
715 in thermoregulation and tolerance against desiccating conditions in drosophilids.  
716 *Entomol. Res.* 38:49–60
- 717 **Reusch, T. B. H. and Wood, T. E.** (2007). Molecular ecology of global change. *Mol. Ecol.* **16:**  
718 3973–3992.
- 719 **Rourke, B. C.** (2000). Geographical and altitudinal variation in water balance and metabolic rate  
720 in a California Grasshopper, *Melanoplus sanguinipes*. *J. Exp. Biol.* **203:** 2699–2712
- 721 **Telonis-Scott, M., Guthridge, K. M. and Hoffmann, A. A.** (2006). A new set of laboratory-  
722 selected *Drosophila melanogaster* lines for the analysis of desiccation resistance:  
723 response to selection, physiology and correlated responses. *J. Exp. Biol.* **209:** 1837–  
724 1847.
- 725 **Telonis-Scott, M., Hoffmann, A. A. and Sgrò, C. M.** (2011). The molecular genetics of clinal  
726 variation: a case study of *ebony* and thoracic trident pigmentation in *Drosophila*  
727 *melanogaster* from eastern Australia. *Mol. Ecol.* **20:** 2100–2110.
- 728 **Toolson, E. C.** (1984). Interindividual variations in epicuticular hydrocarbon composition and  
729 water loss rates of the cicada, *Tibicen dealbatus* (Homoptera: Cicadidae). *Physiol. Zool.*  
730 **57:** 5505–5556.
- 731 **Toolson, E. C. and Hadley, N. F.** (1979). Seasonal effects on cuticular permeability and  
732 epicuticular lipid composition in *Centruroides sculpturatus* Ewing 1928 (Scorpiones:  
733 Buthidae). *J. Comp. Physiol.* **129:** 319–325
- 734 **Toolson, E. C. and Kuper-Simbro'n, R.** (1989). Laboratory evolution of epicuticular  
735 hydrocarbon composition and cuticular permeability in *Drosophila pseudoobscura*:  
736 effects of sexual dimorphism and thermal-acclimation ability. *Evolution* **43:** 468–473

- 737 **Toolson, E.C.** (1982). Effects of rearing temperature on cuticle permeability and epicuticular  
738 lipid composition in *Drosophila pseudoobscura*. *J. Exp. Zool.* **22**: 249–253.
- 739 **True, J. R.** (2003). Insect melanism: the molecules matter. *Trends Ecol. Evol.* **18**: 640-647.
- 740 **Umina, P. A., Weeks, A. R., Kearney, M. R., McKechnie, S. W. and Hoffmann, A. A.**  
741 (2005). A rapid shift in a classic clinal pattern in *Drosophila* reflecting climate change.  
742 *Science* **308**: 691–693.
- 743 **Watt, W B.** (1969). Adaptive significance of pigment polymorphisms in *Colias* butterflies. II  
744 Thermorégulation and photoperiodically controlled melanin variation in *Colias*  
745 *furytheme*. *Proc. Nat. Aca. Sci. U.S.*, **63**: 767 -774.
- 746 **Wittkopp, P. J., Carroll, S. B. and Kopp, A.** (2003). Evolution in black and white: genetic  
747 control of pigment patterns in *Drosophila*. *Trends Genet.* **19**: 495-504.
- 748 **Wittkopp, P. J., Smith-Winberry, G., Arnold, L. L., Thompson, E. M., Cooley, A. M.,**  
749 **Yuan, D., Song, Q. and McAllister, B. F.** (2011). Local adaptation for body color in  
750 *Drosophila americana*. *Heredity* **106**: 592–602

751  
752  
753  
754  
755  
756  
757

758 **Legend to figures**

759

760 Fig. 1 (A) Variation ( $m \pm s.d.$ ) of abdominal melanisation in a sample of flies ( $n= 1236$ ) after  
761 mass breeding for seven generations in the laboratory at 21 °C and before onset of laboratory  
762 selection. (B) data on regression of R (response to selection) on  $\Sigma S$  (cumulative selection  
763 differential) are shown for estimation of realized heritability of laboratory selected dark and light  
764 lines of *D. melanogaster*.

765

766 Fig 2 .(A) Results of laboratory selection upto 60<sup>th</sup> generation for changes in total body  
767 melanisation per fly in control and selected dark and lighter lines of *D. melanogaster*. (B - D)  
768 correlated changes in desiccation resistance, cuticular water loss and dehydration tolerance are  
769 shown after every five generations of laboratory selection in darker and lighter lines alongwith  
770 their respective control lines. For each trait, data are shown as means of five replicate lines.  
771 Selection was made on the melanisation of female flies but corresponding changes in males are  
772 also shown.

773

774 Figure 3. (A) Changes ( $\text{mean} \pm s.d.$ ) in cuticular melanisation; (B) desiccation resistance hours  
775 (C) cuticular water loss; and (D) cutitcular lipid content in dark and light selected lines of *D.*  
776 *melanogaster* as compared with control lines. Trait values represent data on 60<sup>th</sup> generation of  
777 selection. Each value is based on analysis of ten replicates of ten individual flies each of five  
778 replicate lines of control as well as selected dark and light lines of *D. melanogaster*.

779

780 Fig. 4 (A) Desiccation survival curves of control and laboratory selected darker and lighter body  
781 color lines of *D. melanogaster* (n = 5 each; values are shown as average percentage survival per  
782 hour) when stressed in groups of ten female flies of 60<sup>th</sup> generation. Correlated changes in  
783 desiccation resistance, cuticular water loss and dehydration tolerance in control and five selected  
784 (dark and light) lines. Between line variability (mean  $\pm$  s.d.) are shown for desiccation related  
785 traits as a function of changes in body melanisation of control and selected lines of dark and light  
786 body color.

787

788

789

790

791

792

793

794

795

796

797

798

799

800

801  
802

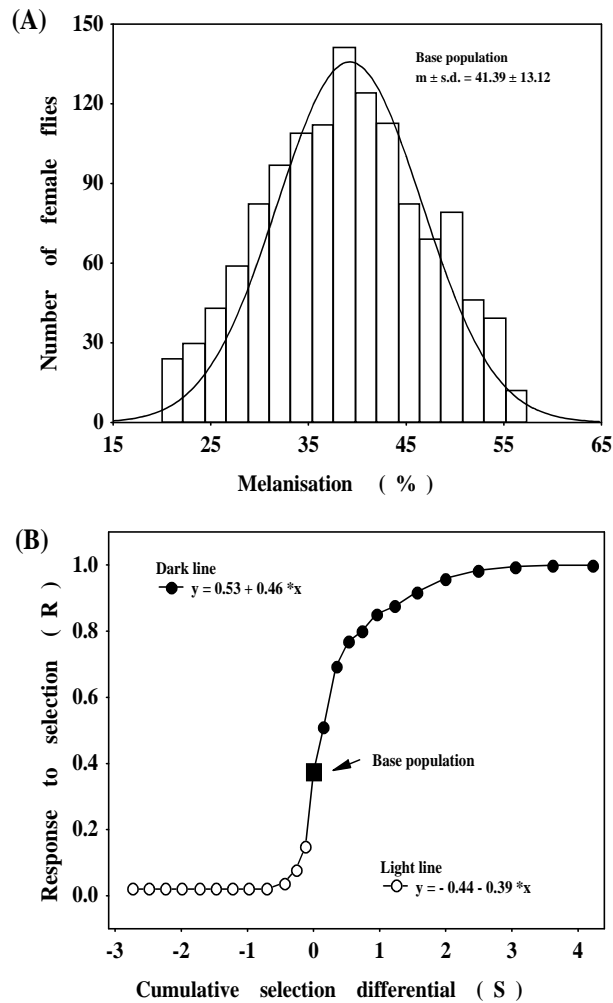

803  
804  
805  
806  
807  
808  
809  
810  
811  
812  
813  
814  
815  
816  
817  
818  
819  
820

Fig. 1 (A) Variation ( $m \pm s.d.$ ) of abdominal melanisation in a sample of flies ( $n= 1236$ ) after mass breeding for seven generations in the laboratory at 21 °C and before onset of laboratory selection. (B) data on regression of R (response to selection) on  $\sum S$  (cumulative selection differential) are shown for estimation of realized heritability of laboratory selected dark and light lines of *D. melanogaster*.

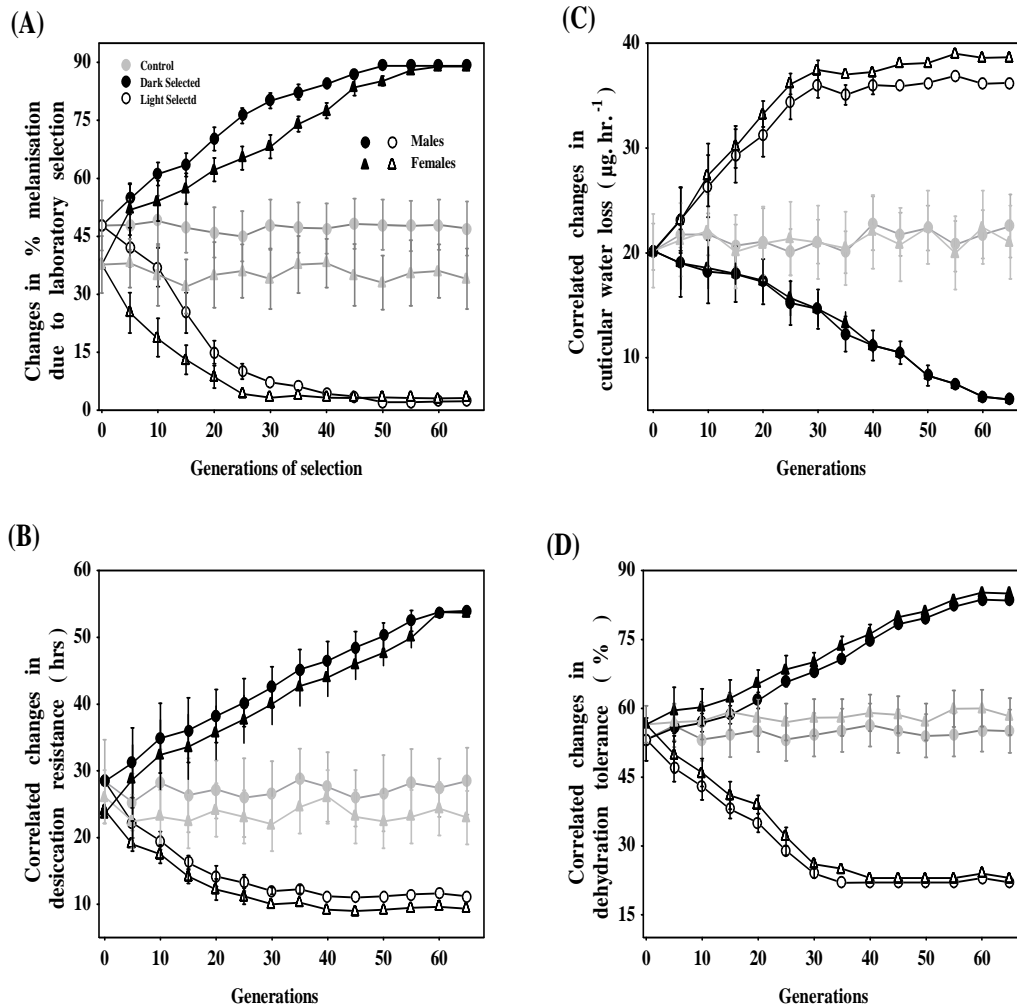

822

823

824

825

826

827

828

829

830

831

Fig 2. (A) Results of laboratory selection upto 60<sup>th</sup> generation for changes in total body melanisation per fly in control and selected dark and lighter lines of *D. melanogaster*. (B - D) correlated changes in desiccation resistance, cuticular water loss and dehydration tolerance are shown after every five generations of laboratory selection in darker and lighter lines alongwith their respective control lines. For each trait, data are shown as means of four replicate lines. Selection was made on the melanisation of female flies but corresponding changes in males are also shown.

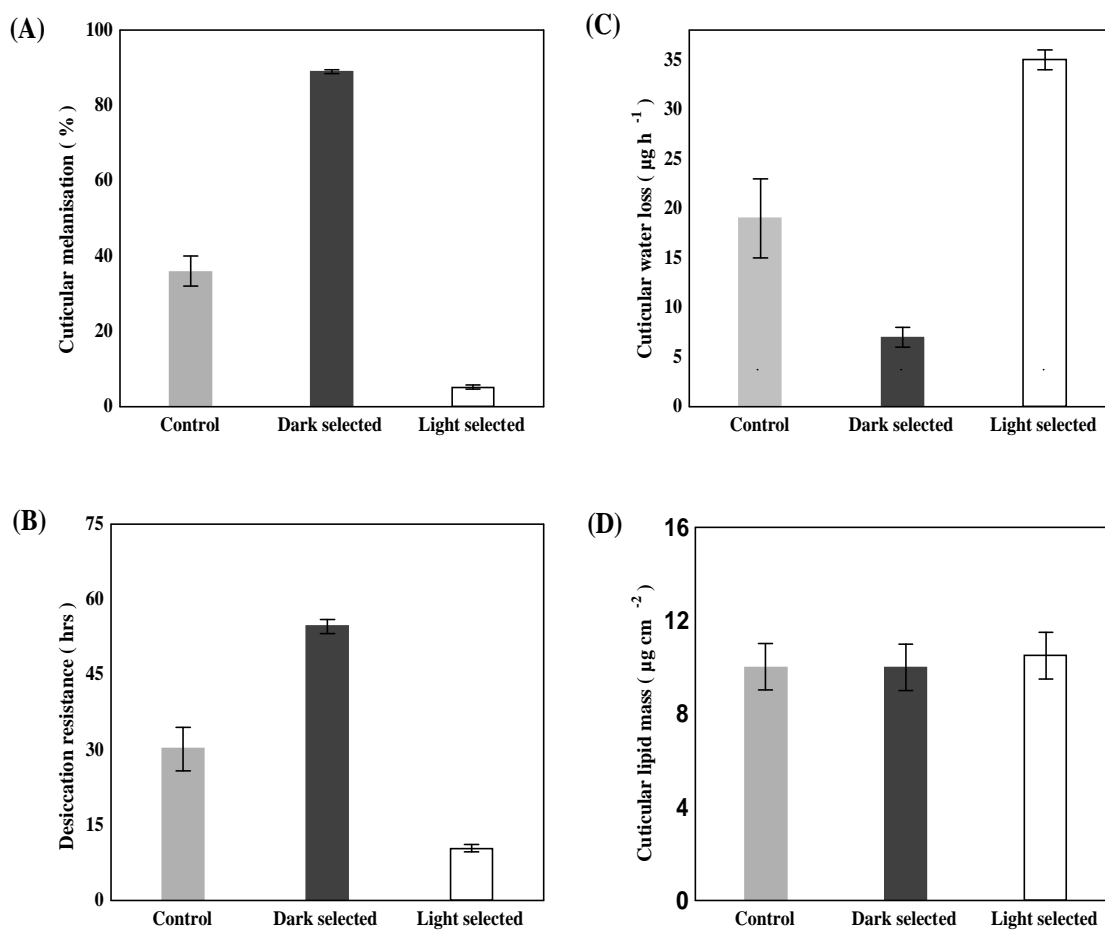

832

833 Figure 3. (A) Changes (mean  $\pm$  s.d.) in cuticular melanisation; (B) desiccation resistance  
 834 hours (C) cuticular water loss; and (D) cuticular lipid content in dark and light selected  
 835 lines of *D. melanogaster* as compared with control lines. Trait values represent data on  
 836 60<sup>th</sup> generation of selection. Each value is based on analysis of ten replicates of ten  
 837 individual flies each of four replicate lines of control as well as selected dark and light  
 838 lines of *D. melanogaster*.

839

840

841

842

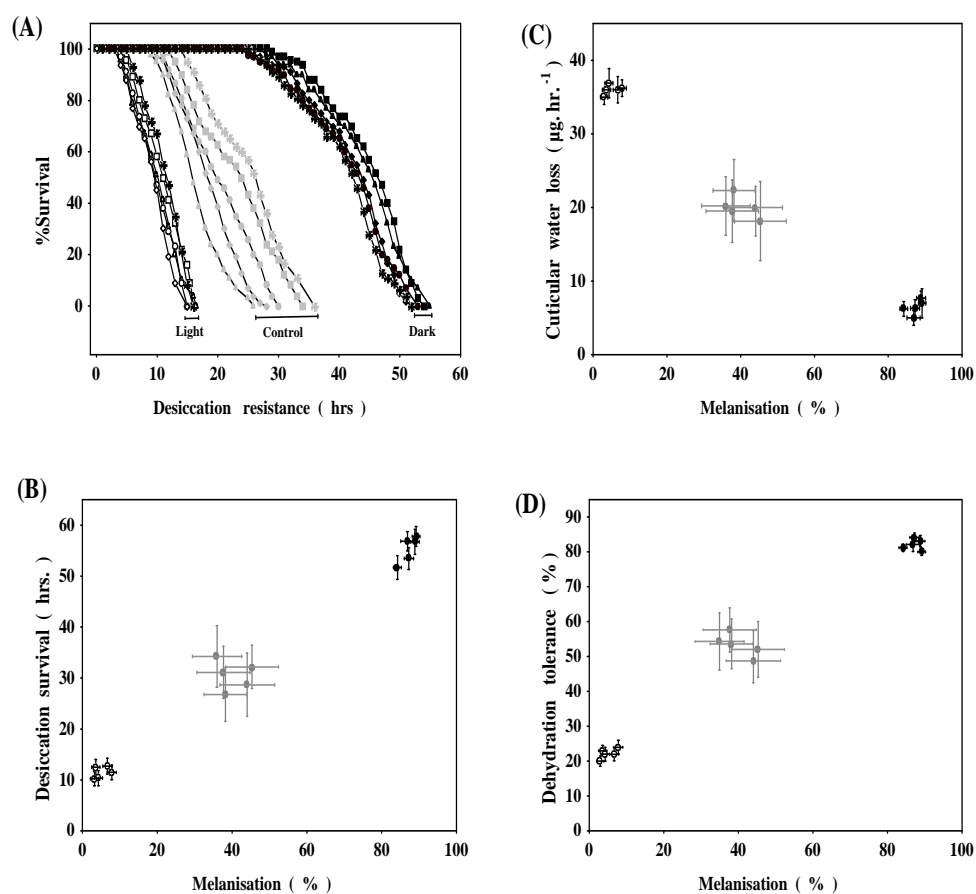

843  
 844 Fig. 4 (A) Desiccation survival curves of control and laboratory selected darker  
 845 and lighter body color lines of *D. melanogaster* ( $n = 5$  each; values are shown as  
 846 average percentage survival per hour) when stressed in groups of ten female flies  
 847 of 60<sup>th</sup> generation. Correlated changes in desiccation resistance, cuticular water  
 848 loss and dehydration tolerance in control and four selected (dark and light) lines.  
 849 Between line variability (mean  $\pm$  s.d.) are shown for desiccation related traits as a  
 850 function of changes in body melanisation of control and selected lines of dark and  
 851 light body color.  
 852  
 853  
 854  
 855  
 856  
 857  
 858  
 859  
 860  
 861  
 862



863

864 Table 1. Data (mean  $\pm$  s.e.) for changes in body melanisation, desiccation resistance and rate of water  
 865 loss in four replicate lines of dark and light selected as compared with control lines ( $n = 4$ ). For each  
 866 trait, ANOVA values represent statistical differences between selected (dark- D or light- L) and control  
 867 lines. Each value is based on analysis of ten replicates of ten individual flies of each sex.  
 868

|                                                                                                                                                    | Replicate lines | Melanisation (%) |                  | Desiccation resistance (hrs) |                  | RWL ( $\mu\text{g fly}^{-1}$ ) |                  |
|----------------------------------------------------------------------------------------------------------------------------------------------------|-----------------|------------------|------------------|------------------------------|------------------|--------------------------------|------------------|
|                                                                                                                                                    |                 | $\text{♂}$       | $\text{♀}$       | $\text{♂}$                   | $\text{♀}$       | $\text{♂}$                     | $\text{♀}$       |
|                                                                                                                                                    |                 | Control (C)      | C 1              | 47.21 $\pm$ 5.21             | 43.50 $\pm$ 4.25 | 26.01 $\pm$ 3.21               | 29.1 $\pm$ 3.10  |
|                                                                                                                                                    | C 2             | 48.32 $\pm$ 7.02 | 38.21 $\pm$ 4.98 | 29.53 $\pm$ 4.29             | 34.4 $\pm$ 4.02  | 20.21 $\pm$ 3.98               | 23.21 $\pm$ 4.22 |
|                                                                                                                                                    | C 3             | 47.25 $\pm$ 3.25 | 42.57 $\pm$ 5.65 | 25.55 $\pm$ 4.71             | 32.8 $\pm$ 4.21  | 18.14 $\pm$ 5.36               | 21.50 $\pm$ 3.65 |
|                                                                                                                                                    | C 4             | 46.36 $\pm$ 4.98 | 39.57 $\pm$ 6.21 | 21.22 $\pm$ 3.89             | 26.5 $\pm$ 3.29  | 20.30 $\pm$ 4.22               | 22.11 $\pm$ 4.78 |
| Dark selected (D)                                                                                                                                  | D 1             | 90.00 $\pm$ 0.65 | 87.25 $\pm$ 0.33 | 52.21 $\pm$ 1.22             | 54.4 $\pm$ 1.12  | 6.30 $\pm$ 1.20                | 7.21 $\pm$ 1.00  |
|                                                                                                                                                    | D 2             | 86.58 $\pm$ 0.36 | 88.26 $\pm$ 0.18 | 53.11 $\pm$ 2.00             | 56.7 $\pm$ 2.45  | 7.12 $\pm$ 0.89                | 7.56 $\pm$ 0.89  |
|                                                                                                                                                    | D 3             | 89.14 $\pm$ 0.12 | 88.56 $\pm$ 0.14 | 50.98 $\pm$ 1.89             | 51.6 $\pm$ 1.30  | 6.23 $\pm$ 1.01                | 6.39 $\pm$ 1.77  |
|                                                                                                                                                    | D 4             | 87.98 $\pm$ 0.14 | 86.00 $\pm$ 0.54 | 54.22 $\pm$ 1.25             | 56.8 $\pm$ 1.89  | 6.89 $\pm$ 1.00                | 7.14 $\pm$ 0.77  |
| Light selected (L)                                                                                                                                 | L 1             | 3.60 $\pm$ 0.21  | 4.22 $\pm$ 0.54  | 14.00 $\pm$ 1.70             | 16.5 $\pm$ 0.56  | 36.21 $\pm$ 1.13               | 37.54 $\pm$ 1.32 |
|                                                                                                                                                    | L 2             | 1.10 $\pm$ 0.13  | 3.23 $\pm$ 0.36  | 13.74 $\pm$ 0.99             | 16.5 $\pm$ 0.49  | 35.98 $\pm$ 1.02               | 36.87 $\pm$ 1.00 |
|                                                                                                                                                    | L 3             | 2.25 $\pm$ 0.19  | 3.21 $\pm$ 0.25  | 16.04 $\pm$ 1.74             | 18.0 $\pm$ 0.51  | 36.89 $\pm$ 0.98               | 37.00 $\pm$ 1.89 |
|                                                                                                                                                    | L 4             | 2.32 $\pm$ 0.17  | 5.00 $\pm$ 0.52  | 12.36 $\pm$ 1.12             | 16.0 $\pm$ 0.61  | 36.11 $\pm$ 1.00               | 36.98 $\pm$ 1.00 |
| Mean squares for ANOVAs (df)                                                                                                                       |                 |                  |                  |                              |                  |                                |                  |
| C vs. D                                                                                                                                            | Lines (7)       | 17512.7***       | 19854.3***       | 3264.47***                   | 2963.52***       | 546.61***                      | 547.85***        |
|                                                                                                                                                    | Error (72)      | 4.141            | 3.012            | 0.723                        | 0.954            | 0.519                          | 0.405            |
| C vs. L                                                                                                                                            | Lines (7)       | 12242.5***       | 10254.1***       | 3065.28***                   | 2732.96***       | 629.46***                      | 759.78***        |
|                                                                                                                                                    | Error(72)       | 5.323            | 4.901            | 0.712                        | 0.623            | 0.730                          | 0.619            |
| df – degree of freedom; MS – means square ***p< 0.001; ns = non-significant. ANOVAs on melanisation were carried out on arcsine- transformed data. |                 |                  |                  |                              |                  |                                |                  |

869

870

871

872

873

874

875

876

877

878

879

880 Table 2. *Data (mean ± s.e.) for changes in body water content, hemolymph volume and dehydration*  
 881 *tolerance in four replicate lines of dark and light selected as compared with control lines. For each*  
 882 *trait, ANOVA values represent statistical differences between selected (dark- D or light- L) and*  
 883 *control lines. Each value is based on ten replicates of ten individual flies.*

884

|                                                                                                                                                    | Replicate lines | Water content (mg fly <sup>-1</sup> ) |           | Hemolymph (%) |            | Dehydration tolerance (%) |            |
|----------------------------------------------------------------------------------------------------------------------------------------------------|-----------------|---------------------------------------|-----------|---------------|------------|---------------------------|------------|
|                                                                                                                                                    |                 | ♀                                     | ♂         | ♀             | ♂          | ♀                         | ♂          |
| Control (C)                                                                                                                                        | C 1             | 1.25±0.04                             | 1.23±0.04 | 15.25±2.21    | 13.43±3.21 | 56.66±2.32                | 50.01±3.21 |
|                                                                                                                                                    | C 2             | 1.22±0.05                             | 1.19±0.04 | 13.54±3.21    | 12.00±2.21 | 54.32±3.21                | 49.53±4.29 |
|                                                                                                                                                    | C 3             | 1.19±0.04                             | 1.18±0.03 | 14.12±2.36    | 12.12±2.98 | 52.01±2.98                | 50.55±4.71 |
|                                                                                                                                                    | C 4             | 1.21±0.03                             | 1.20±0.04 | 14.00±2.07    | 12.56±2.13 | 53.65±3.14                | 51.22±3.89 |
| Dark selected (D)                                                                                                                                  | D 1             | 1.32±0.01                             | 1.29±0.02 | 20.21±0.89    | 18.19±1.01 | 84.20±1.21                | 82.21±1.22 |
|                                                                                                                                                    | D 2             | 1.34±0.02                             | 1.30±0.01 | 21.32±1.11    | 19.30±0.98 | 83.11±1.58                | 81.11±2.00 |
|                                                                                                                                                    | D 3             | 1.33±0.02                             | 1.31±0.01 | 22.32±0.85    | 20.11±1.00 | 81.21±1.05                | 81.98±1.89 |
|                                                                                                                                                    | D 4             | 1.33±0.01                             | 1.28±0.02 | 21.27±0.99    | 20.21±0.88 | 82.11±0.97                | 82.22±1.25 |
| Light selected (L)                                                                                                                                 | L 1             | 1.06±0.01                             | 1.03±0.02 | 11.67±0.21    | 10.11±0.87 | 22.23±1.23                | 21.00±1.70 |
|                                                                                                                                                    | L 2             | 1.09±0.01                             | 1.05±0.02 | 10.99±0.80    | 10.00±1.03 | 23.13±2.51                | 21.74±0.99 |
|                                                                                                                                                    | L 3             | 1.05±0.02                             | 1.02±0.01 | 9.78±0.74     | 11.21±0.56 | 22.98±1.58                | 22.04±1.74 |
|                                                                                                                                                    | L 4             | 1.06±0.02                             | 1.03±0.02 | 10.23±0.81    | 10.88±0.87 | 22.19±1.21                | 21.36±1.12 |
| Mean squares for ANOVAs (df)                                                                                                                       |                 |                                       |           |               |            |                           |            |
| C vs. D                                                                                                                                            | Lines (7)       | 0.038**                               | 0.406**   | 0.015***      | 0.019***   | 0.3013***                 | 0.2843***  |
|                                                                                                                                                    | Error (72)      | 0.003                                 | 0.002     | 0.00001       | 0.00004    | 0.0004                    | 0.0007     |
| C vs. L                                                                                                                                            | Lines (7)       | 0.291**                               | 0.191**   | 0.0026***     | 0.0061     | 0.7427***                 | 0.6943***  |
|                                                                                                                                                    | Error (72)      | 0.002                                 | 0.001     | 0.0001        | 0.0002     | 0.001                     | 0.002      |
| df – degree of freedom; MS – means square ***p< 0.001; ns = non-significant. ANOVAs on percent data were carried out on arcsine- transformed data. |                 |                                       |           |               |            |                           |            |

885

886

887

888

889

890

891

892

893

894

895

896

897 Table 3. Correlation values ( $r \pm s.e.$ ) for each of different ecophysiological traits with  
 898 changes in cuticular melanisation and with cuticular lipid mass in selected lines for dark and  
 899 light body color of *D. melanogaster*.

900

| Traits                                            | Trait correlation ( $r \pm s.e.$ ) |               |                  |               |
|---------------------------------------------------|------------------------------------|---------------|------------------|---------------|
|                                                   | % Melanisation                     |               | Cuticular lipids |               |
|                                                   | Dark                               | Light         | Dark             | Light         |
| 1. Melanisation (%)                               | --                                 | --            | -0.24±0.28 ns    | 0.33±0.27 ns  |
| 2. Cuticular lipid mass ( $\mu\text{g cm}^{-2}$ ) | -0.24±0.28 ns                      | 0.18±0.31 ns  | --               | --            |
| 3. Body water content                             | 0.89±0.07**                        | 0.85±0.08**   | -0.21±0.21 ns    | 0.28±0.31 ns  |
| 4. Hemolymph (%)                                  | 0.91±0.03***                       | 0.89±0.07***  | -0.35±0.19 ns    | 0.31±0.27 ns  |
| 5. Desiccation (hrs)                              | 0.98±0.04***                       | 0.99±0.03***  | -0.25±0.27 ns    | 0.32±0.27 ns  |
| 6. Cuticular water loss ( $\mu\text{g h}^{-1}$ )  | -0.96±0.07***                      | -0.97±0.05*** | 0.19±0.23 ns     | -0.30±0.27 ns |
| 7. Dehydration tolerance                          | 0.96±0.05***                       | 0.90±0.12***  | -0.21±0.23 ns    | 0.15±0.28 ns  |

ns = nonsignificant, \*\* $P < 0.01$ ; \*\*\* $P < 0.001$

901
